# Supplementary material for: Screening Value of Timed Up and Go Test for Frailty and Low Physical Performance in Korean Older Population: The Korean Frailty and Aging Cohort Study (KFACS)
Source: PubMed Central journal article supplement — Ann Geriatr Med Res. 2020 Dec 10;24(4):259–66. doi: 10.4235/agmr.20.0072 (PMC7781966; doi:10.4235/agmr.20.0072), 2020-12-10
Supplement: agmr-20-0072-suppl.pdf [file agmr-20-0072-suppl.pdf]

## Supplementary Materials

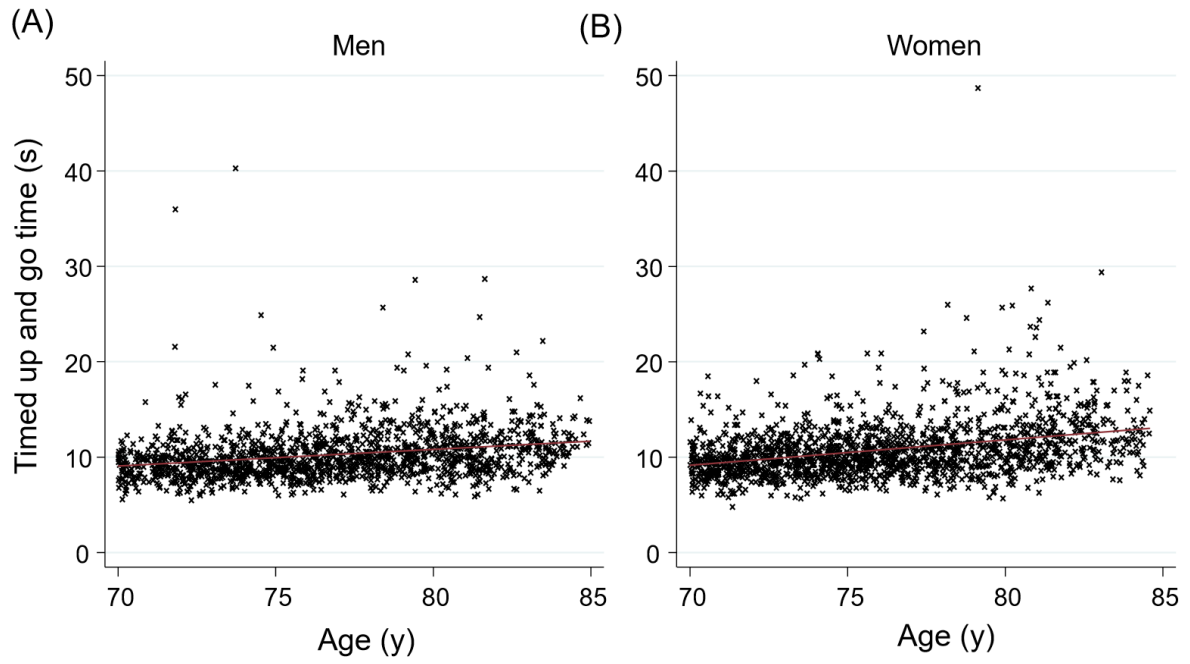

**Fig. S1.** The association between Timed Up and Go test time and age in men (A) and women (B).
